# Supplementary material for: Pectin from Citrus Canning Wastewater as Potential Fat Replacer in Ice Cream
Source: MDPI journal article supplement (doi:10.3390/molecules23040925), 2018-04-17
Supplement: s1 [file s1]

## Supplementary Materials

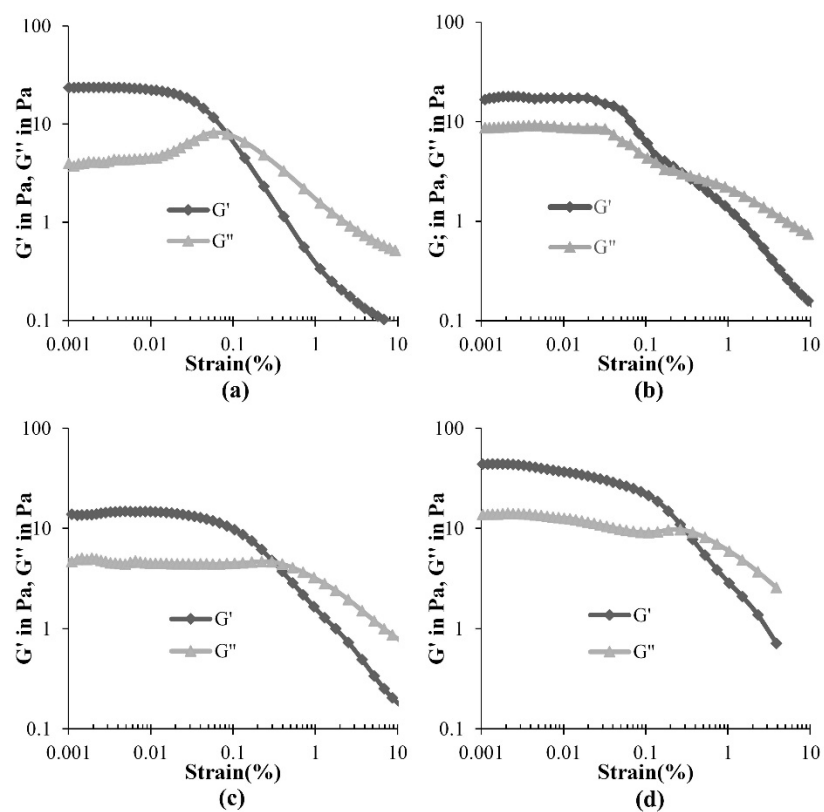

**Figure S1. The  $G'$ (storage shear modulus) and  $G''$ (loss shear modulus) of Control(a) ,T1 (b),T2(c), T3(d) ice creams from strain amplitude sweep ( $\gamma= 0.001\%-10\%$ ) at a fixed angular frequency (1Hz).**
